# Supplementary material for: Development in PaCO2 over 12 months in patients with COPD with persistent hypercapnic respiratory failure treated with high-flow nasal cannula—post-hoc analysis from a randomised controlled trial
Source: HighWire-hosted journal article supplement (doi:10.1136/bmjresp-2020-000712), 2020-11-01
Supplement: bmjresp-2020-000712supp001_data_supplement.pdf [file bmjresp-2020-000712supp001_data_supplement.pdf]

## HFNC in type 2 respiratory failure COPD

Table S1: Arterial blood gas values obtained at site visits, with prescribed oxygen dosage and after 30 minutes' treatment with High Flow Nasal Cannula as add-on to prescribed oxygen (+30). Mean values (standard deviations). P-values from T-test on pH, sat and BE, at baseline and after 12 months, which are not provided in the paper, included below

|                         | Baseline   | Baseline,<br>+30 | 6 months   | 6 months,<br>+30 | 12 months   | 12 months,<br>+30 |
|-------------------------|------------|------------------|------------|------------------|-------------|-------------------|
| Add O <sub>2</sub> , L  | 1.5 (0.5)  | 1.6(0.6)         | 1.6(0.6)   | 1.9 (1.2)        | 1.6(0.7)    | 1.9(1.1)          |
| High Flow, L            |            | 20 (1)           |            | 20(1)            |             | 20(1)             |
| pH                      | 7.40(0.03) | 7.40(0.02)       | 7.39(0.03) | 7.41(0.03)       | 7.39(0.03)* | 7.41(0.03)        |
| PaO <sub>2</sub> , kPa  | 9.9 (1.4)  | 8.8(1.04)        | 9.5(1.5)   | 8.9(1.1)         | 9.7(1.5)    | 8.8(1.2)          |
| Sat, %                  | 95(2)      | 93(2)            | 94(4)      | 93(3)            | 94(3)**     | 93(3)             |
| PaCO <sub>2</sub> , KPa | 7.33(1.2)  | 6.9(1.0)         | 7.4(1.5)   | 7.9(1.1)         | 7.2(1.4)    | 6.9(1.4)          |
| St.Bic<br>(mmol/L)      | 30.1(2.8)  | 30.4(2.8)        | 30.3(3.5)  | 30.7 (3.8)       | 30.3(4.0)   | 30.3(4.1)         |
| BE                      | 7.4 (3.5)  | 7.6(3.5)         | 7.8(4.3)   | 7.9(4.5)         | 7.3(4.9)*** | 7.4(5.0)          |

Add O<sub>2</sub>: Oxygen flow supplied at time of arterial puncture; PaO<sub>2</sub>: Arterial Partial pressure of oxygen; kPa: kilo Pascal; PaCO<sub>2</sub>: Arterial Partial pressure of Carbon Dioxide; St.Bic: Standard Bicarbonate; BE: Base Excess

\*p=0.76; \*\*p=0.04; \*\*\*p=0.78

## HFNC in type 2 respiratory failure COPD

Table S2: Arterial blood gas values obtained at site visits, with prescribed oxygen dosage and, in addition, at 12 months, after 30 minutes' treatment with High Flow Nasal Cannula as add-on to prescribed oxygen (+30), N=21. Mean values (standard deviations). P-values from T-test on pH, sat and BE, at baseline and after 12 months, which are not provided in the paper, included below.

|                         | Baseline  | 6 months  | 12 months   | 12 months, +30 |
|-------------------------|-----------|-----------|-------------|----------------|
| Add O <sub>2</sub> , L  | 1.5(0.5)  | 1.5(0.5)  | 1.5(0.7)    | 1.9(1.7)       |
| High Flow, L            |           |           |             | 20(1)          |
| pH                      | 7.4(0.02) | 7.4(0.03) | 7.4(0.03)*  | 7.41(0.02)     |
| PaO <sub>2</sub> , kPa  | 10.0(1.6) | 9.9(1.9)  | 9.5(1.6)    | 8.6(1.2)       |
| Sat, %                  | 95(2)     | 94(3)     | 94(3)**     | 92(3)          |
| PaCO <sub>2</sub> , KPa | 6.9(0.6)  | 7.2(0.9)  | 7.4(1.1)    | 7.1(0.8)       |
| St.Bic (mmol/L)         | 30.2(2.5) | 30.7(2.4) | 30.8(3.0)   | 31.4(2.9)      |
| BE                      | 7.3(2.9)  | 7.9(3.0)  | 8.2(3.5)*** | 8.7(3.2)       |

Add O<sub>2</sub>: Oxygen flow supplied at time of arterial puncture PaO<sub>2</sub>: Arterial Partial pressure of oxygen; kPa: kilo Pascal; PaCO<sub>2</sub>: Arterial Partial pressure of Carbon Dioxide; St.Bic: Standard Bicarbonate; BE: Base Excess

\*p=0.71; \*\*p=0.04; \*\*\*p=0.68
